# Supplementary figures and images for: Curcumin improves spinal cord injury by regulating the Treg/Th17 balance via modulation of the gut microbiota
Source: Research Square preprint supplement (doi:10.21203/rs.3.rs-7518068/v1), 2025-09-26

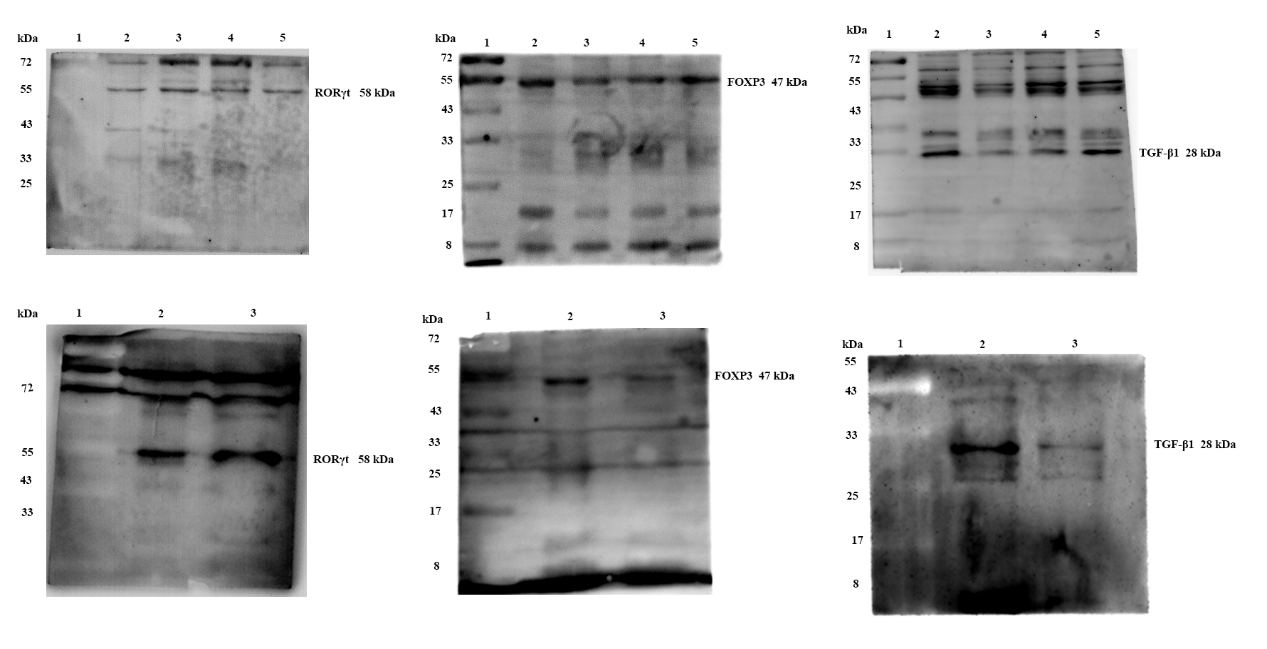

Supplement: Supplementary file 1 [file 5e8b31aafa942d5a01d3df40.docx]
